# Supplementary material for: XIAP inhibitors induce differentiation and impair clonogenic capacity of acute myeloid leukemia stem cells
Source: PubMed Central journal article supplement (PMC4147327; doi:10.18632/oncotarget.2016), 2014-05-26
Supplement: oncotarget-05-4337-s001.pdf [file oncotarget-05-4337-s001.pdf]

**XIAP inhibitors induce differentiation and impair clonogenic capacity of acute myeloid leukemia stem cells - Moreno-Martínez et al**

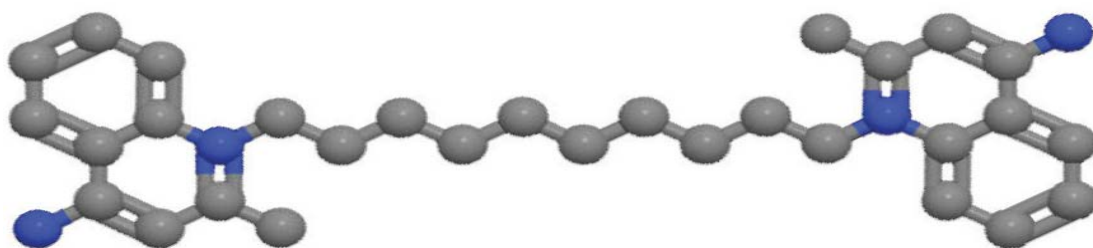

**Supplementary Figure 1. Chemical structure of Dequalinium.** Chemical structure generated in Jmol software. Blue atoms: Nitrogen, Grey atoms: Carbon.
